# ANESTHESIOLOGY

## Volume 4

### INDEX TO SUBJECTS

Items having boldface figures indicate titled subjects of articles

- Abdominal operations, lung volume after, **385**
- Abscess, submandibular, anesthesia for, **25**
- Acute massive collapse, **298, 437**
- Acute pulmonary edema, **508**
- Adrenal cortical extract in shock, **504**
- Age, effect on choice of anesthetics, **17**
- Air, intravenous injection, **202**
- Airway,
  - during pentothal anesthesia, **536**
  - importance, **621**
  - increased pressure in, circulatory effects, **612**
- Albumin, use in shock, **506**
- Alcohol, nerve block, **303**
  - effect on nerve, **467**
- Amylene hydrate,
  - anesthetic action, **525**
  - effect on bronchi, **253**
- Analeptics, after pentothal, **180**
- Anatomy,
  - for caudal anesthesia, **182**
  - related to peridural anesthesia, **376**
  - stellate ganglion, **150**
- Anesthesia,
  - block,
    - abdominal, **518**
    - caudal, **517**
    - continuous caudal, **181**
    - complication, **517**
    - diagnostic, **153, 301, 363**
    - effect on temperature, **398**
    - peridural, **372**
    - skin marking for, **312**
    - stellate ganglion, **153, 403**
    - sympathetic, **301, 363, 404**
    - temperature during, **398**
    - therapeutic, **153, 301**
    - tibial, **398**
    - wartime use, **517, 622**
  - continuous caudal, **181**
    - effect on fetus, **187**
  - continuous spinal, wartime use, **519**
  - death, **233, 293**
  - development, **409**
  - diagnostic,
    - in hypertension, **363**
    - wartime use, **518**
  - effect of war, **637**
  - food before, **81**
  - for dentistry, pentothal sodium, **174**
  - for esophageal operations, **274**
  - for Ludwig's angina, **25**
  - for sympathectomy, **361**
  - for thoracic operations, anoxia in, **266**
  - geriatrics and, **17**
  - history, **279, 409, 540, 596**
  - intratracheal,
    - after laryngectomy, **277**
    - development, **409**
    - for esophageal operation, **275**
    - improved technic, **6**
    - with pentothal induction, **71**
    - with topical anesthesia, **27**
  - intravenous,
    - for dentistry, **174**
    - wartime, **67, 70, 74, 534, 621**
  - nerve block, diagnostic, **301**
  - obstetric, continuous caudal, **185**
  - paravertebral, role in atelectasis, **297**
  - peridural segmental, **372**
    - drugs for, **528**
  - positive pressure, effect on circulation, **612**
  - records, **312**
  - reflexes during, **345**
  - refrigeration, **12**
  - shock during, **247**
    - effect of premedication, **475**
  - signs, continuous caudal, **192**
  - spinal,
    - complications, **519, 625, 640**
    - effect of hypertension, **364**
    - effect on small intestine, **588**
    - for diabetic patient, **625**
    - for geriatrics, **20**
    - temperature during, **393**
    - wartime use, **516, 518, 621**
  - temperature during, **392**
  - therapeutic, wartime, **518**
  - wartime, **67, 70, 74, 516, 534, 619**
- Anesthesiology, in wartime, **433, 619**
- Anesthetics,
  - effect in shock, **247**
  - effect on bronchi, **253**
  - effect on small intestine, **577**
  - explosion of, **306**
  - in oil, effect on nerve fiber, **465**
  - inflammability, **441**
  - local, **528**
  - long acting local, **303**
- Anoxia,
  - during intrathoracic operations, **266**
  - effect on heart, **31**
- Apparatus
  - anesthetic, historical, **410**
  - arm holder, **644**

- canister for soda lime, 160
- carbon dioxide absorption, early models, 596
- chair for moving patients, 178
- for blood transfusion, 203
- for continuous caudal, 189
- for continuous spinal, metal protector, 645
- for ether insufflation, 311
- for inflating cuff on intratracheal tube, 10
- for intravenous anesthesia, 174, 547, 642
- for oxygen administrations, 48, 177
- funnel, 545
- gas machines, early models, 423
- intratracheal tube with cuff, 9
- laryngoscope with thin blade, 27
- syringe holder, 547, 644
- resuscitation, 438, 608
- Arteriospasm, relief, 153
- Atelectasis, 293, 308, 437
  - after spinal anesthesia, 520
  - during anesthesia, 293
  - postoperative, 308
- Atropine sulfate,
  - effect in shock, 475
  - effect on bronchi, 258, 369
  - effect on respiration, 347
  - effect on small intestine, 583, 584
  - intravenously, during cyclopropane, 204
- Barbiturates,
  - concentration in blood, 113
  - concentration in brain, 118
  - effect in shock, 247, 475, 503
  - effect on bronchi, 253
  - recovery from tissues, 114
- Binders, effect on lung volume, 385
- Blood,
  - barbiturates in, 113
  - donor, fatality, 202
  - epinephrine-level, effect of cyclopropane, 31
  - flow, in shock, 500
  - glucose level, effect of cyclopropane, 31
  - oxygen, 266
    - during nitrous oxide anesthesia, 145
  - plasma, in shock, 504
  - pressure,
    - during shock, 500
    - effect of anesthetics, 247, 364
    - effect of premedication, 238, 477
    - effect of splanchicectomy, 366
    - tests of, 363
  - replacement, in shock, 504
  - serum, in shock, 504
  - transfusion, 203
  - vessel, diseases, nerve block, 301
  - volume, in shock, 500
- Brain, concentration of barbiturates in, 118
- Bronchi, effect of anesthetics, 253
- Bronchospasm,
  - during anesthesia, 276
  - during sympathectomy, 369
- Butyn, effect on respiration, 347
- Carbon dioxide,
  - effect on temperature, 396
  - inadequate elimination of, 603
- Carbon dioxide absorption, 160, 596
- Causalgia, relief, 153, 301
- Cerebral vascular occlusions, block anesthesia in, 403
- Children, effect of pentothal, 180
- Chloroform, effect on bronchi, 253
- Circulation, effects of pressure in airway, 612
- Cocaine,
  - spray, before intubation, 27
  - with epinephrine, effect on pupil, 152
- Codeine sulfate, postoperative effect, 430
- Complemental air, 386
- Complications,
  - after block anesthesia, 517
  - after continuous caudal block, 193
  - after intubation, 6
  - after spinal anesthesia, 519, 640
  - after sympathectomy, 367
  - atelectasis, 293, 308, 437, 520
  - decerebrate rigidity, 543
  - intestinal, effect of drugs, 577
  - postoperative,
    - effect of narcotics, 430
    - in aged persons, 23
  - pulmonary edema, 263
- Concentrated human serum albumin, 506
- Coronary pain, relief with intravenous morphine, 61
- Cyanosis, 266
- Cyclop sodium, pharmacology of, 135
- Cyclopropane,
  - atropine during, 204
  - bradycardia during, 204
  - bronchospasm during, 276
  - effect on blood glucose levels, 31
  - effect on blood-epinephrine, 31
  - effect on bronchi, 253
  - effect on heart, 487
  - effect on small intestine, 587
  - effect on temperature, 394
  - in geriatrics, 20
  - in hypertension, 365
  - pulmonary edema, during, 513
  - under increased pressure, effect on circulation, 612
- Dead space, importance in anesthesia, 603
- Decerebrate rigidity, 543
- Demerol, 126
- Dentistry, pentothal anesthesia for, 174
- Diabetes, complication during anesthesia, 625
- Diagnosis,
  - anesthesia for, 363, 518
  - value of morphine, 61
- Digitalis, use of, effect on choice of anesthetic, 366
- Dilauid hydrochloride, postoperative effects, 430
- Diothane ointment, 27

- Distention,  
effect of drugs, 577  
effect on lung volume, 385
- Drugs,  
analeptic, after pentothal, 180  
anesthetic, effect on bronchi, 253  
autonomic, effects during anesthesia, 258  
effect on small intestine, 577  
intravenous administration, 53  
local anesthetic, for peridural anesthesia, 528  
narcotic, postoperative effects, 430  
vasoconstrictive,  
during spinal, 519  
in shock, 503
- Dyspnea, relief with intravenous morphine, 61
- Electronarcosis, 630
- Ephedrine sulfate,  
after splanchnicectomy, 366  
effect on bronchi, 258  
effect on temperature, 400
- Epinephrine,  
after splanchnicectomy, 366  
during cyclopropane anesthesia, 31  
during trichlorethylene anesthesia, 3  
effect on bronchi, 258  
in local anesthetic solutions, 517  
with cocaine, effect on pupil, 152
- Ergotamine tartrate, effect during anesthesia, 259
- Eserine salicylate, effect on bronchi, 258
- Esophagus,  
operations of, anesthesia for, 274  
reflexes, effect on respiration, 345
- Ether  
cyclopropyl methyl, effect on bronchi, 253  
diethyl,  
apparatus for, 311  
effect of premedication, 475  
effect on bronchi, 253  
effect on shock, 247  
effect on small intestine, 585  
under increased pressure, effect on circulation, 612  
propyl methyl, effect on bronchi, 253  
vinyl, effect on bronchi, 253
- Ethyl chloride, effect on bronchi, 253
- Ethylene,  
effect on bronchi, 253  
effect on small intestine, 587  
for intrathoracic operations, 267
- Ethylene-oxygen-ether, effect on small intestine, 589
- Eucupin, in oil, 466
- Evipal soluble, 68  
dangers, 76  
effect on bronchi, 259
- Explosion, of anesthetic gases  
in closed system, 604  
precautions, 306
- Extradural space, 377
- Eye-brow pencil, skin marker, 312
- Fluids, intravenously,  
complication, 641  
during sympathectomy, 369  
effect on lung volume, 385  
replacement in shock, 504
- Food,  
before anesthesia, 81  
before pentothal anesthesia, 179  
effect on intestinal motility, 578, 581
- Fractures, role in shock, 502
- Functional residual air, 385
- Funnel, for pouring ether, 545
- Gas pains, effect of drugs, 577
- Gases, inflammability, 604
- Gastric tube, insertion in unconscious patient, 81
- Geriatrics, anesthesia in, 17
- Heart,  
disease, intravenous morphine, 61  
effect of cyclopropane, 31, 204, 487  
effect of trichlorethylene, 1  
in hypertensive patient, 365
- Heat,  
external, value in shock, 503  
of carbon dioxide absorption, 602
- Hemoconcentration,  
effect of premedication, 477  
in shock, 500
- Hemoglobin, concentration, effect of anesthetics, 247
- Hemorrhage, control, 502
- Hirschsprung's disease, treatment, 302
- Homatropine, effect on sympathectomized pupil, 152
- Hormones, steroid, anesthetic effects, 36
- Horner's syndrome, 152
- Human serum albumin, 506
- Hyoscine hydrobromide, effect on bronchi, 258
- Hypertension,  
operation for, anesthetic management, 361  
treatment, splanchnic block, 304
- Hypoglycemia, effect on body functions, 625
- Ice water, test of vascular response, 363
- Intracaine, peridural block with, 372, 528
- Intratracheal tubes, dangers in use, 6
- Intubation,  
aid in passing gastric tube, 81  
effect on respiration, 346  
under topical anesthesia, 27
- Insulin shock, 627
- Intestine, small, effect of drugs, 577
- Kidney, in hypertension, effect of anesthetics, 365
- Laryngectomy, intubation after, 277
- Laryngeal edema, 307
- Laryngospasm, during pentothal anesthesia, 537

- Long, Crawford Williamson, 279  
 Ludwig's angina, anesthesia for, 25  
 Lung,  
     collapse, during anesthesia, 368  
     effect of anesthetics, 253  
     thymic tissue in, 233  
     volume, after abdominal operations, 385
- Medical societies, 197  
 Metabolites, effect on respiration, 348  
 Meters, on gas machines, 602  
 Metrazol, after pentothal, 180  
 Metycaine,  
     for continuous caudal analgesia, 181  
     wartime use, 517  
 Morphine acetate, 54  
 Morphine sulfate,  
     compared to Demerol, 126  
     effect, 238  
     effect in shock, 475  
     effect on bronchi, 260  
     effect on small intestine, 583, 584  
     effect on temperature, 398  
     intravenously, 53  
         side reactions, 63  
     postoperative effects, 430  
     role in shock, 502  
     use before barbiturate, 76  
 Mouth, reflexes, effect on respiration, 345  
 Muscle, effect on respirations, 345
- Narcotics, postoperative effects, 430  
 Needles, broken, 193  
 Nembutal (see pentobarbital sodium)  
 Neosynephrin, after splanchicectomy, 366  
 Nerves,  
     effect of anesthetics in oil, 465  
     sympathetic, block, 301  
     visceral, 377  
 Nervous system, autonomic, effect of anesthetics, 260  
 Nitrous oxide,  
     effect on arterial oxygen tension, 145  
     effect on arterial spasm, 400  
     effect on bronchi, 253  
     effect on small intestine, 587  
 Nitrous oxide-oxygen-ether,  
     effect on small intestine, 589  
 Novatropine, effect on bronchi, 258  
 Nupercaine,  
     in oil, 466  
     wartime use, 517
- Oil anesthetics, effect on nerves, 465  
 Oil of almonds, anesthetics in, 466  
 Oxygen,  
     blood, 266  
     during intravenous anesthesia, 76  
     during spinal anesthesia, 520  
     effect of drugs, 238  
     in shock, 247, 503  
     inhalation, effect on temperature, 396  
     postoperatively, 267  
 Oxygen tension, arterial, during nitrous oxide, 145  
 Oxygen therapy,  
     apparatus, 48  
     nasotracheal airway, 29
- Pain,  
     effect of cold, 13  
     effect of morphine intravenously, 58  
     effect on lung volume, 385  
     of embolic origin, 153  
     role in shock, 502  
 Pantopon, postoperative effects, 431  
 Paraldehyde, effect on bronchi, 253  
 Pentobarbital sodium,  
     effect on shock, 247, 475  
     recovery from tissues, 114  
     with scopolamine, effects, 238  
 Pentothal sodium,  
     dangers, 68  
     diagnostic use, 363  
     effect on shock, 247  
     effect on small intestine, 584  
     effect on temperature, 394  
     for case of gunshot wound, 70  
     for dental surgery, 174  
     induction to ether, effect on small intestine, 583  
     precautions in use, 77  
     rate of injection, effect on small intestine, 584  
     stability of solution, 642  
     use in geriatrics, 20  
     wartime use, 68, 70, 521, 534, 621  
     with nitrous oxide-oxygen, effect on small intestine, 589  
 Phenobarbital, effect on bronchi, 253  
 Phlegmasia alba dolens, treatment, 302  
 Physostigmine, effect on respiration, 348  
 Picrotoxin, after pentothal, 180  
 Pneumothorax,  
     after resuscitation, 437  
     during anesthesia, 368  
 Position,  
     after shock, 503  
     effect on lung volume, 385  
 Postoperative care, 296  
     after sympathectomy, 369  
 Premedication,  
     before pentothal anesthesia, 179, 537  
     before thoracic operations, 277  
     Demerol, 126  
     effect in atelectasis, 295  
     effect in shock, 475  
     effect on small intestine, 577  
     in hypertension, 365  
     wartime use, 522  
 Procaine,  
     block,  
         peridural, 381, 528  
         stellate ganglion, 153, 404

- sympathetic nerve, 301
- effect on bronchi, 258
- in oil, 466
- spinal anesthesia, effect on small intestine, 588
- Prostigmine, effect on bronchi, 260
- Pulse,
  - during shock, 499
  - rate, effect of premedication, 238
- Pulmonary edema, 508, 640
- during anesthesia, 263
- Pupil, effect of drugs, 238
- Reflexes, respiratory, 345
- Refrigeration, anesthesia, 12
- Reserve air, 385
- Residual air, 385
- Respiration,
  - effect of premedication, 238
  - reflex stimulation, 345
- Respiratory obstruction, laryngeal edema, 307
- Resuscitation,
  - apparatus for, 608
  - of infants, 438
- Scopolamine hydrobromide,
  - with Demerol, 129
  - with pentobarbital sodium, 238
- Serum albumin, concentrated, human, 506
- Shock,
  - effect of increased pressure, in airway, 615
  - effect of premedication, 475
  - in aged persons, 19
  - intravenous anesthesia during, 67, 70, 75
  - signs of, 500
  - treatment, 497
  - use of pentothal sodium during, 70
  - traumatic, under anesthetics, 247
- Skin,
  - marking, for nerve block, 312
  - temperature, during anesthesia, 392
- Small intestine, effect of drugs, 577
- Soda lime, 598
  - absorption patterns, 164
  - indicator, 165
- Sodium amytal,
  - diagnostic use, 363
  - effect in shock, 475
  - effect on cardiac irregularities, 491
  - recovery from tissues, 114
- Sodium cyclopentenylallyl barbiturate (see cyclopal)
- Sodium ipral, effect on bronchi, 259
- Sodium n-butyl 1-methylallyl thiobarbiturate, 248
- Sodium nitrite, diagnostic use, 363
- Stellate ganglion, 150
  - block, 403
- Steroids, assay, 36
- Subtidal air, 385
- Survival time, effect of barbiturates, 247
- Sweating, effect of sympathectomy, 152
- Sympathalgia, treatment, 301
- Sympathectomy, anesthesia for, 361
- Sympathetic nerves, block, 301
- Temperature, body,
  - effect of anesthesia, 392, 396
  - effect of drugs, 238
  - in shock, 503
- Tetrachlorethylene, 283
- Thorax, operations, anoxia during, 266
- Thrombophlebitis, treatment, sympathetic block, 302, 401, 518
- Thrombosis,
  - cerebral, block anesthesia, 403
  - pain following, 153
- Thymic tissue, bronchial compression with, 233
- Tidal air, 385
- Tonsillectomy, death during, 233
- Trachea, reflexes, effect on respiration, 345
- Tracheobronchial aspiration, 267
  - after atelectasis, 297
- Tribromethyl alcohol, 523
  - before gas anesthesia, effect on small intestine, 590, 592
  - diagnostic use, 363
  - effect in shock, 475
  - effect on bronchi, 253
  - effect on small intestine, 584
- Trichlorethanol, 523
  - effect on bronchi, 253
- Trichlorethylene,
  - effect on cardiac rhythm, 1
  - in anesthetic mixtures, inflammability, 441
- Vascular disease, cerebral, block anesthesia, 403
- Vasospasm, nerve block, 301
- Venipuncture, 535, 538
- Vital capacity, 386
- Vomiting,
  - during pentothal anesthesia, 537
  - effect of narcotics, 430
- Wartime,
  - anesthesia, 516, 534
  - intravenous, 67, 70, 74, 534, 621
  - anesthesiology in, 619
  - effect on civilian anesthesia, 637

# INDEX OF AUTHORS AND TITLES OF ORIGINAL ARTICLES

|                                                                                                                                                                        | PAGE |                                                                                                     | PAGE |
|------------------------------------------------------------------------------------------------------------------------------------------------------------------------|------|-----------------------------------------------------------------------------------------------------|------|
| Abajian, John, Jr.:                                                                                                                                                    |      | Bishop, Kingsley:                                                                                   |      |
| Peridural segmental anesthesia with intracaine.....                                                                                                                    | 372  | Tetrachlorethylene as an anesthetic agent.....                                                      | 283  |
| Pharmacologic studies in search of a suitable drug for peridural segmental anesthesia.....                                                                             | 528  | Bookhamer, J. W.:                                                                                   |      |
| Adams, R. C.:                                                                                                                                                          |      | Pulmonary edema during anesthesia—case reports.....                                                 | 263  |
| Intravenous anesthesia with pentothal sodium in the case of gunshot wound associated with accompanying severe traumatic shock and loss of blood: report of a case..... | 70   | Bortin, A. W.:                                                                                      |      |
| Adams, W. E.:                                                                                                                                                          |      | A new oxygen therapy apparatus: preliminary report.....                                             | 48   |
| Clinical investigation of anoxia in intrathoracic operations (preliminary report)                                                                                      | 266  | Brace, D. E.:                                                                                       |      |
| Adriani, John:                                                                                                                                                         |      | Reflexes from the mouth, trachea and esophagus which stimulate respiration..                        | 345  |
| Effect of anesthetic drugs upon bronchi and bronchioles of excised lung tissue..                                                                                       | 253  | Burdick, D. L.:                                                                                     |      |
| Allen, F. M.:                                                                                                                                                          |      | Anesthetic management of patients undergoing sympathectomy for hypertension.....                    | 361  |
| Refrigeration anesthesia for limb operations.....                                                                                                                      | 12   | Case, Evelyn H.:                                                                                    |      |
| Allen, R. O.:                                                                                                                                                          |      | Present status of trichlorethanol.....                                                              | 523  |
| Electronarcosis.....                                                                                                                                                   | 630  | Clement, F. W.:                                                                                     |      |
| Altshuler, M. D.:                                                                                                                                                      |      | Observations on wartime anesthesia....                                                              | 516  |
| Significance of changes in the lung volume and its subdivisions during and after abdominal operations.....                                                             | 385  | Collier, T. J.:                                                                                     |      |
| Anderson, B. M.:                                                                                                                                                       |      | Crawford Williamson Long, 1815-1878.                                                                | 279  |
| Analysis of blood for certain barbiturates and the variability of their concentration in the blood.....                                                                | 113  | Conroy, W. A.:                                                                                      |      |
| Anderson, C. D.:                                                                                                                                                       |      | Studies in carbon dioxide absorption...                                                             | 160  |
| Effects of certain premedicants on traumatic shock produced in animals under ether anesthesia.....                                                                     | 475  | Cook, Evelyn V.:                                                                                    |      |
| Apgar, Virginia:                                                                                                                                                       |      | Arterial oxygen tension with nitrous oxide anesthesia.....                                          | 145  |
| Tetrachlorethylene as an anesthetic agent.....                                                                                                                         | 283  | Cullen, S. C.:                                                                                      |      |
| Baird, J. W.:                                                                                                                                                          |      | Arterial oxygen tension with nitrous oxide anesthesia.....                                          | 145  |
| Geriatrics and anesthesia.....                                                                                                                                         | 17   | Pulmonary edema during anesthesia—case reports.....                                                 | 263  |
| Bassett, D. L.:                                                                                                                                                        |      | Dille, J. M.:                                                                                       |      |
| Circulatory effects of increased pressure in the airway.....                                                                                                           | 612  | Pharmacology of sodium cyclopentenylallyl barbiturate (cyclopal).....                               | 135  |
| Batterman, R. C.:                                                                                                                                                      |      | Duncan, Donald:                                                                                     |      |
| Utility of demerol as a substitute for the opiates in preanesthetic medication....                                                                                     | 126  | Comparison of the actions on nerve fibers of certain anesthetic mixtures and substances in oil..... | 465  |
| Beecher, H. K.:                                                                                                                                                        |      | Eason, Edith:                                                                                       |      |
| Circulatory effects of increased pressure in the airway.....                                                                                                           | 612  | Acute pulmonary edema—case report..                                                                 | 508  |
| Bennett, H. S.:                                                                                                                                                        |      | Editorial.....                                                                                      | 433  |
| Circulatory effects of increased pressure in the airway.....                                                                                                           | 612  | Editorial.....                                                                                      | 540  |
| Bennett, J. H.:                                                                                                                                                        |      | Editorial:                                                                                          |      |
| Anesthetic management for drainage of abscess of the submandibular space (Ludwig's angina).....                                                                        | 25   | Anesthesia of the sympathetic nerves...                                                             | 301  |
|                                                                                                                                                                        |      | Editorial:                                                                                          |      |
|                                                                                                                                                                        |      | Impact of war on civilian anesthesia...                                                             | 637  |
|                                                                                                                                                                        |      | Editorial:                                                                                          |      |
|                                                                                                                                                                        |      | The question of intravenous anesthesia in war surgery.....                                          | 74   |
|                                                                                                                                                                        |      | Editorial:                                                                                          |      |
|                                                                                                                                                                        |      | The selective professional society during world turmoil.....                                        | 197  |

- Edwards, W. B.:  
Comprehensive review of continuous caudal analgesia for anesthetists..... 181
- Elder, C. K.:  
Observations on wartime anesthesia.... 516
- Essex, H. E.:  
Analysis of blood for certain barbiturates and the variability of their concentration in the blood..... 113  
Effects of certain premedicants on traumatic shock produced in animals under ether anesthesia..... 475  
Study of traumatic shock under certain anesthetics..... 247
- Foot, Ellen, B.:  
Tetrachlorethylene as an anesthetic agent..... 283
- Foregger, Richard:  
Surface temperatures during anesthesia. 392
- Gillespie, N. A.:  
Trichlorethylene anesthesia and cardiac rhythm..... 1
- Goebel, Joan:  
Complication of diabetes during spinal anesthesia..... 625
- Golden, R. F.:  
Effects of drugs used in anesthesiology on the tone and motility of the small intestine: an experimental study..... 577
- Gray, H. K.:  
Intravenous anesthesia with pentothal sodium in the case of gunshot wound associated with accompanying severe traumatic shock and loss of blood: report of a case..... 70
- Grimm, J. E.:  
An improved intratracheal technic..... 6
- Griswold, H. E., Jr.:  
Effect of cyclopropane anesthesia on the glucose and epinephrine levels of the blood..... 31
- Halford, F. J.:  
Critique of intravenous anesthesia in war surgery..... 67
- Hawk, M. H.:  
Effects of nembutal (sodium pentobarbital) and scopolamine on human subjects..... 238
- Heard, R. D. H.:  
Fish assay for the anesthetic effect of the steroids..... 36
- Heller, E. L.:  
Aberrant thymic tissue in the lung—with bronchial compression and sudden death during anesthesia..... 233
- Hickcox, C. B.:  
Stellate ganglion: its significance in practice..... 150
- Hingson, R. A.:  
Comprehensive review of continuous caudal analgesia for anesthetists..... 181
- Hubbell, A. O.:  
Pentothal sodium anesthesia for dental surgery in office practice and control of recovery time..... 174
- Jarvis, W. H.:  
Comparison of the actions on nerve fibers of certain anesthetic mixtures and substances in oil..... 465
- Karp, Mary:  
Acute pulmonary edema—case report... 508
- Karstens, A. I.:  
Effect of cyclopropane anesthesia on the glucose and epinephrine levels of the blood..... 31
- Kendrick, D. B., Jr.:  
Practical approach to the treatment of shock..... 497
- Keys, T. E.:  
Development of anesthesia..... 409
- Kipple, Helen M.:  
Pharmacology of sodium cyclopentenylallyl barbiturate (cyclopal)..... 135
- Knight, R. T.:  
An improved intratracheal technic..... 6
- Kreiselman, Joseph:  
New resuscitation apparatus..... 608
- Lee, W. V.:  
Mechanism of production of spontaneous cardiac irregularities with high concentrations of cyclopropane..... 487
- Livingstone, H.:  
Clinical investigation of anoxia in intrathoracic operations (preliminary report) 266
- Mann, F. C.:  
Effects of drugs used in anesthesiology on the tone and motility of the small intestine: an experimental study..... 577
- McQuiston, W. O.:  
Arterial oxygen tension with nitrous oxide anesthesia..... 145
- Meek, W. J.:  
Mechanism of production of spontaneous cardiac irregularities with high concentrations of cyclopropane..... 487
- Ochsner, Alton:  
Editorial: Anesthesia of the sympathetic nerves..... 301
- Orth, O. S.:  
Mechanism of production of spontaneous cardiac irregularities with high concentrations of cyclopropane..... 487  
Trichlorethylene anesthesia and cardiac rhythm..... 1
- Papper, E. M.:  
Anesthesiology in military medicine.... 619

|                                                                                                                                  |     |                                                                                                                     |     |
|----------------------------------------------------------------------------------------------------------------------------------|-----|---------------------------------------------------------------------------------------------------------------------|-----|
| Patterson, R. L.:<br>Aberrant thymic tissue in the lung—with<br>bronchial compression and sudden death<br>during anesthesia..... | 233 | Scoville, W. B.:<br>Stellate ganglion: its significance in prac-<br>tice.....                                       | 150 |
| Pender, J. W.:<br>Study of traumatic shock under certain<br>anesthetics.....                                                     | 247 | SeEVERS, M. H.:<br>Studies in carbon dioxide absorption...                                                          | 160 |
| Peterson, M. C.:<br>Complication of diabetes during spinal<br>anesthesia.....                                                    | 625 | Selye, Hans:<br>Fish assay for the anesthetic effect of the<br>steroids.....                                        | 36  |
| Phelps, McK. L.:<br>Anesthetic management of patients<br>undergoing sympathectomy for hyper-<br>tension.....                     | 361 | Sheehan, W. C.:<br>Anesthesiology in military medicine....                                                          | 619 |
| Presman, David:<br>Critical analysis of the use of intravenous<br>morphine.....                                                  | 53  | Steele, J. D.:<br>The narcotic as a factor in postoperative<br>nausea and vomiting.....                             | 430 |
| Raskind, Robert:<br>Stellate ganglion: its significance in<br>practice.....                                                      | 150 | Thornton, T. F., Jr.:<br>Clinical investigation of anoxia in intra-<br>thoracic operations (preliminary report)     | 266 |
| Reichel, John, Jr.:<br>Practical approach to the treatment of<br>shock.....                                                      | 497 | Tovell, R. M.:<br>Stellate ganglion: its significance in prac-<br>tice.....                                         | 150 |
| Reid, L. C.:<br>Reflexes from the mouth, trachea and<br>esophagus which stimulate respiration..                                  | 345 | Volpitto, P. P.:<br>Use of stellate ganglion block in cerebral<br>vascular occlusions.....                          | 403 |
| Risteen, W. A.:<br>Use of stellate ganglion block in cerebral<br>vascular occlusions.....                                        | 403 | Wangeman, C. P.:<br>Effect of cyclopropane anesthesia on the<br>glucose and epinephrine levels of the<br>blood..... | 31  |
| Robertazzi, Raphael:<br>Complication of diabetes during spinal<br>anesthesia.....                                                | 625 | Effects of nembutal (sodium pento-<br>barbital) and scopolamine on human<br>subjects.....                           | 238 |
| Rose, A. T.:<br>Sodium pentothal: actual experience in<br>the combat zone.....                                                   | 534 | Mechanism of production of spontaneous<br>cardiac irregularities with high concen-<br>trations of cyclopropane..... | 487 |
| Ross, P. S.:<br>Electronarcosis.....                                                                                             | 630 | Waters, R. M.:<br>Chemical absorption of carbon dioxide<br>from anesthetic atmospheres.....                         | 596 |
| Rovenstine, E. A.:<br>Editorial: the selective professional so-<br>ciety during world turmoil.....                               | 197 | Trichlorethylene anesthesia and cardiac<br>rhythm.....                                                              | 1   |
| Effect of anesthetic drugs upon bronchi<br>and bronchioles of excised lung tissue..                                              | 253 | Wellman, V.:<br>Clinical investigation of anoxia in intra-<br>thoracic operations (preliminary report)              | 266 |
| Utility of demerol as a substitute for the<br>opiates in preanesthetic medication....                                            | 126 | Wilkins, A. R.:<br>Anesthesia in esophageal surgery.....                                                            | 274 |
| Schotz, Seymour:<br>Clinical aspects of pulmonary atelectasis<br>(with case report of a death under anes-<br>thesia).....        | 293 | Youmans, W. B.:<br>Effect of cyclopropane anesthesia on the<br>glucose and epinephrine levels of the<br>blood.....  | 31  |
| Critical analysis of the use of intravenous<br>morphine.....                                                                     | 53  |                                                                                                                     |     |



## INDEX OF AUTHORS AND TITLES OF ABSTRACTS

|                                                                                                                        | PAGE |                                                                                                | PAGE |
|------------------------------------------------------------------------------------------------------------------------|------|------------------------------------------------------------------------------------------------|------|
| Adams, R. C., Lundy, J. S. and Seldon, T. H.:                                                                          |      | Beck, M. C.:                                                                                   |      |
| Continuous caudal anesthesia or analgesia: a consideration of the technic, various uses and some possible dangers.     | 568  | Symposium on anesthesia: anesthesia in obstetrics.....                                         | 231  |
| Adams, W. B.:                                                                                                          |      | Beecher, H. K.:                                                                                |      |
| Prevention and treatment of postoperative pulmonary atelectasis by the stir-up regimen and tracheobronchial toilet.... | 653  | Choice of anesthesia for seriously wounded patients.....                                       | 460  |
| Adriani, John:                                                                                                         |      | "Shock" and anesthesia in transthoracic gastric surgery.....                                   | 557  |
| Symposium on anesthesia: pharmacologic basis of the selection of anesthesia                                            | 314  | Beecher, H. K. and Craig, F. N.:                                                               |      |
| Anderson, B. M., Mousel, L. H. and Mayo, C. W.:                                                                        |      | Tissue metabolism following shock induced by hemorrhage.....                                   | 653  |
| Combined spinal and intravenous anesthesia for operations on the colon.....                                            | 339  | Bennett, J. H.:                                                                                |      |
| Andrews, H. L.:                                                                                                        |      | Preparation of the patient for anesthesia                                                      | 316  |
| Effect of morphine and prostigmine methylsulfate on measurements of pain threshold.....                                | 221  | Betlach, C. J.:                                                                                |      |
| Annotations:                                                                                                           |      | Selective anesthesia.....                                                                      | 329  |
| Crile's contribution to surgery.....                                                                                   | 549  | Bird, H. M., Kilner, S. D. and Martin, D. J.:                                                  |      |
| Armattoo, R.:                                                                                                          |      | Post-operative respiratory complications in service cases.....                                 | 670  |
| Case of anaphylaxis after anaesthesia..                                                                                | 648  | Block, Nathan and Rotstein, Morris:                                                            |      |
| Arnold, W. O.:                                                                                                         |      | Continuous drip caudal anesthesia in obstetrics.....                                           | 648  |
| Shock.....                                                                                                             | 314  | Blusger, I. N. and Dixon, J. H.:                                                               |      |
| Ausherman, H. M.:                                                                                                      |      | Pentothal sodium anaesthesia for cystoscopy.....                                               | 552  |
| Individualized anesthesia.....                                                                                         | 214  | Bowman, R. O.:                                                                                 |      |
|                                                                                                                        |      | Fluid administration.....                                                                      | 325  |
| Bakst, H. J. and McCormick, G. W.:                                                                                     |      | Brace, D. E.:                                                                                  |      |
| Use of local anesthesia in the treatment of contusions and sprains.....                                                | 446  | Premedication, anesthesia, oxygen and plasma therapy, for the war gas casualty                 | 210  |
| Bancroft, F. W.:                                                                                                       |      | Brentnall, C. P.:                                                                              |      |
| Thrombosis and embolism.....                                                                                           | 670  | Local anesthesia in vulval and vaginal surgery.....                                            | 662  |
| Barbour, J. H. and SeEVERS, M. H.:                                                                                     |      | Brown, Manson and Nicholson, M. J.:                                                            |      |
| Narcosis induced by carbon dioxide at low environmental temperatures.....                                              | 665  | Regional anesthesia.....                                                                       | 226  |
| Barefoot, S. W. and Callaway, J. L.:                                                                                   |      | Burt, E. F.:                                                                                   |      |
| Exfoliative dermatitis due to phenobarbital: report of a case with recovery.                                           | 451  | Pathologic lesions of asphyxia neonatorum.....                                                 | 671  |
| Barnard, M. A.:                                                                                                        |      | Bush, M. T., Dickison, H. L. and Lamson, P. D.:                                                |      |
| Shock.....                                                                                                             | 323  | Stable anesthetic solutions of barbituric acids.....                                           | 220  |
| Barnes, A. R.:                                                                                                         |      |                                                                                                |      |
| Problem of pulmonary embolism.....                                                                                     | 315  | Caiger, G. H.:                                                                                 |      |
| Barrows, E. F. and Dodds, H.:                                                                                          |      | Role of the epiglottis in anesthetic deaths                                                    | 112  |
| Body temperature of mice during anesthesia.....                                                                        | 221  | Cassels, W. H.:                                                                                |      |
| Batten, D. H.:                                                                                                         |      | Considerations regarding the depth of anesthesia.....                                          | 452  |
| Absorption of carbon dioxide from anesthesia apparatus.....                                                            | 461  | Casten, Daniel, Bodenheimer, Milton and Barcham, Irving:                                       |      |
| Batterman, R. C. and Himmelsbach, C. K.:                                                                               |      | Study of plasma protein variations in surgical patients.....                                   | 454  |
| Demerol—a new synthetic analgesic: review of its present status and comparison with morphine.....                      | 558  | Ceballos, Alejandro:                                                                           |      |
| Beck, A. C.:                                                                                                           |      | Operation performed in one stage with inhalation anesthesia for hydatid cysts of the lung..... | 667  |
| Detailed technic of a modified local anesthesia for cesarean section.....                                              | 224  |                                                                                                |      |

|                                                                                                                                                                                                                                                                                                |     |                                                                                                                                          |     |
|------------------------------------------------------------------------------------------------------------------------------------------------------------------------------------------------------------------------------------------------------------------------------------------------|-----|------------------------------------------------------------------------------------------------------------------------------------------|-----|
| Chivers, Elva M.:<br>Anaesthetic explosion due to static electricity.....                                                                                                                                                                                                                      | 656 | Goldberg, Aaron, Koster, Harry and Warshaw, Rose:<br>Fate of procaine in the human body after subarachnoid injection.....                | 445 |
| Clark, S. S.:<br>Spinal anesthesia with pontocaine.....                                                                                                                                                                                                                                        | 566 | Gordon, C. A. and Rosenthal, A. H.:<br>Local anesthesia in obstetrics and gynecology.....                                                | 103 |
| Cole, W. C. C. and Kimball, D. M.:<br>Relationship of maternal ether anesthesia to inauguration of fetal respiration                                                                                                                                                                           | 666 | Govier, W. M.:<br>Studies on shock induced by hemorrhage. III. Correlation of plasma thiamin content with resistance to shock in dogs... | 323 |
| Danna, J. A.:<br>Ether as the anesthetic of choice in prolonged operations.....                                                                                                                                                                                                                | 217 | Gready, T. G., Jr. and Hesseltine, H. C.:<br>Continuous caudal anesthesia in obstetrics: preliminary report.....                         | 342 |
| Davison, T. C.:<br>Use of pentothal-sodium-oxygen anesthesia in major surgery.....                                                                                                                                                                                                             | 98  | Greene, B. A.:<br>Hazards of fire and explosion of anesthetic agents: IV. In the presence of suction and vaporizing machines.....        | 107 |
| De Waal, H. L., Kanaar, A. C. and McNaughtan, Jean:<br>Antisulphanilamide action of procaine in vivo.....                                                                                                                                                                                      | 463 | Greenhill, J. P.:<br>Local anesthesia in obstetrics and gynecology.....                                                                  | 230 |
| Editorial:<br>Anaesthesia for the belly wound.....                                                                                                                                                                                                                                             | 222 | Griswold, R. A. and Woodson, W. H.:<br>Brachial plexus block anesthesia of the upper extremities.....                                    | 447 |
| Editorial (Waters, R. M.):<br>Modern methods in anesthesia and the war.....                                                                                                                                                                                                                    | 321 | Hammes, E. M.:<br>Neurological complications associated with spinal anesthesia (eight cases)...                                          | 650 |
| Edwards, W. B. and Hingson, R. A.:<br>Present status of continuous caudal analgesia in obstetrics.....                                                                                                                                                                                         | 657 | Hand, L. V.:<br>Present day status of anesthesia.....                                                                                    | 209 |
| Elam, John:<br>Trichlorethylene anaesthesia.....                                                                                                                                                                                                                                               | 225 | Spinal anesthesia: factors influencing its success.....                                                                                  | 335 |
| Evans, F. T.:<br>Present status of spinal analgesia.....                                                                                                                                                                                                                                       | 555 | Hayes, I. P.:<br>Compressed oxygen in the treatment of Vincent's infection.....                                                          | 110 |
| Fagler, J.:<br>Action of curare on the respiratory center.....                                                                                                                                                                                                                                 | 222 | Hellman, L. M., Shettles, L. B. and Strand, Herbert:<br>Quantitative method for the determinations of sodium pentothal in blood.....     | 564 |
| Fitzgerald, J. E. and Webster, Augusta:<br>Obstetric significance of barbiturates and vitamin K.....                                                                                                                                                                                           | 96  | Hennig, G. C.:<br>Reactivity of the skin: effect of anesthesia and shock on the histamine and allergic responses.....                    | 655 |
| Foldes, F. F. and Beecher, H. K.:<br>Effect of cholesterol administration on anesthesia.....                                                                                                                                                                                                   | 668 | Hershenson, B. B.:<br>Some observations on anesthesia for neurosurgery.....                                                              | 317 |
| Fraser, R. J.:<br>Continuous lumbar anaesthesia.....                                                                                                                                                                                                                                           | 657 | Hertzog, A. J., Karlstrom, A. E. and Bechtel, M. J.:<br>Accidental amphetamine sulfate poisoning.....                                    | 450 |
| French, E. A. and DeWan, C. H.:<br>Continuous-fractional spinal anesthesia: preliminary report.....                                                                                                                                                                                            | 230 | Hess, Elmer and Merski, A. T.:<br>Some observations in the use of pentothal-sodium.....                                                  | 230 |
| Friedberg, L., Katz, L. N. and Steinitz, F. S.:<br>Effect of drugs on the pulmonary and systemic arterial pressures in the trained unanesthetized dog; renin, angiotonin, adrenalin, pitressin, paredrine, digitalis, acetylcholine, papaverine, histamine, amyl nitrite and aminophyllin..... | 461 | Hewer, C. L.:<br>Trichlorethylene.....                                                                                                   | 554 |
| Gerrie, John and Mackenzie, J. R.:<br>Basal narcosis: for tonsil operations on children.....                                                                                                                                                                                                   | 95  | Trichlorethylene as a general analgesic and anesthetic.....                                                                              | 91  |
| Gold, Harry:<br>Use of bulk ether in anesthesia.....                                                                                                                                                                                                                                           | 216 | Hingson, R. A. and Edwards, W. B.:<br>Continuous caudal analgesia in obstetrics.....                                                     | 342 |
|                                                                                                                                                                                                                                                                                                |     | Hoenigsberger, F.:<br>Collapse under pentothal sodium anaesthesia.....                                                                   | 662 |

- Humby, Graham and Hawksley, Margaret:  
Universal apparatus for peroral intra-tracheal anaesthesia: with the anaesthetist's point of view..... 550
- Irving, F. R.:  
Improvement in catheter technic for continuous caudal anaesthesia..... 658
- Irving, F. R., Lippincott, C. A. and Meyer, F. C.:  
Continuous caudal anaesthesia in obstetrics. Demonstration of catheter technic for administration..... 572
- James, N. R.:  
Infiltrator for regional analgesia..... 659  
Regional analgesia: examples of its advantages and some recent developments 446
- Jarcho, L. W.:  
Effect of nembutal-ether anesthesia upon blood concentration..... 462
- Jesser, J. H. and DeTáakats, Géza:  
Bronchial factor in pulmonary embolism 206
- Johns, W. S.:  
Intravenous anaesthesia..... 552
- Johnson, A. E., Eckman, M., Rumsey, C., Jr. and Barach, A. L.:  
Studies on the effects of adding carbon dioxide to oxygen-enriched atmospheres in low pressure chambers: the oxygen and carbon dioxide tensions of arterial and mixed venous blood in dogs and the effect of blood loss on the oxygen saturation of mixed venous blood and on cardiac output..... 109
- Johnson, C. R. and Mann, F. C.:  
Effect of anesthetics on gastric tonus and motility with special reference to acute gastric dilatation..... 212
- Kennedy, J. A.:  
Technic and device for application of ice anesthesia for amputation of extremities 341
- Knight, R. T.:  
Spinal anesthesia—important principles 565
- Koster, H.:  
Concentration of procaine in the cerebrospinal fluid of the human being after subarachnoid injection: third report.... 556
- Lahey, F. H.:  
Participation in the war effort..... 320
- Lancaster, Blake:  
Intravenous anesthesia..... 565
- Leigh, M. D.:  
Preoperative and postoperative medication..... 94
- Leinwand, Irving:  
Use of local anaesthesia in the treatment of sprains (or local tissue injury without open wounds)..... 446
- Lewis, C. B.:  
Anaesthesia for laryngofissure..... 550
- Lundy, J. S. and Tuohy, E. B.:  
Newer trends in intravenous anesthesia. 563
- Lundy, J. S., Tuohy, E. B., Adams, R. C., Mousel, L. H. and Seldon, T. H.:  
Annual report for 1941 of the section on anesthesia: including data on blood transfusion..... 83
- Lyford, John III:  
Choice of the anaesthetic agent and the care of the patient in relation to the anaesthesia in orthopaedic surgery.... 664
- Maier, H. C.:  
Physiologic basis of thoracic surgery... 91
- Mallinson, F. B.:  
Anaesthesia problems in children..... 331
- Manalan, S. A.:  
Caudal block anesthesia in obstetrics... 219
- Marston, A. D.:  
Basal narcotics in war surgery..... 455  
Two clinical cases and a description of trichlorethylene..... 554
- McIver, M. A. and Winter, Eleanor A.:  
Deleterious effect of anoxia on the liver of the hyperthyroid animal..... 557
- McMaster, P. E.:  
Treatment of ankle sprain: observations in more than five hundred cases..... 664
- McNally, W. D.:  
Use and abuse of the barbiturates.... 99
- McQuiston, W. O. and Cullen, S. C.:  
Nonasphyxial nitrous oxide anesthesia.. 218
- Minnitt, R. J.:  
Analgesia and anesthesia in midwifery.. 344
- Mock, H. E., Jr.:  
Refrigeration anesthesia in skin grafting 567
- Montgomery, T. L.:  
Present status of analgesia and anesthesia from the obstetrician's viewpoint 661
- Moore, A. E. and Guthrie, D. W.:  
Amputation under ice anaesthesia..... 661
- Morgan, A. D.:  
Shock and anaesthesia in relation thereto 317
- Morrison, L. M.:  
Study of hepatic toxicity with seven currently used anesthetics..... 656
- Moyer, C. A. and Beecher, H. K.:  
Effects of barbiturate anesthesia (evipal and pentothal sodium) upon the integration of respiratory control mechanisms. Study directed toward improvement of methods for the preclinical evaluation of anesthetic agents..... 97
- Munro, Donald and Harding, W. G. 2d:  
Lumbar puncture: its potential role in the production of injuries to the intervertebral disk..... 104
- Mushin, W. W.:  
New circle-type carbon-dioxide absorber 460

- Nathanson, M. H., Engelberg, H. and Hersh, J.:  
Cardiovascular effects of pareldrine..... 93
- Neumann, C., Sellers, E. A., Rovenstine, E. A., Cohn, A. E. and Rule, C.:  
Influence of spinal and regional anesthesia upon vasoconstriction and vasodilatation of small peripheral blood vessels..... 660
- Nevin, Mendel and Nevin, H. R.:  
Fundamentals of local anesthesia..... 228
- Newhouser, L. R. and Lozner, E. L.:  
Practical considerations in the therapeutic use of blood derivatives..... 559
- Nicholson, H. C. and Trimby, R. H.:  
Continuously recorded alterations in the buoyancy of anesthetized dogs produced by various respiratory modifiers..... 111
- Nicholson, M. J.:  
Regional anesthesia..... 659
- Nixon, E. A.:  
Amputation anesthesia by freezing..... 567
- Noble, T. D.:  
Barbituric acid poisoning: report of an unusual case..... 206
- Organe, Geoffrey:  
Anaesthesia in air-raid casualties..... 456  
Convulsions following percaine local anaesthesia..... 104
- Papper, E. M., Bradley, S. E. and Rovenstine, E. A.:  
Circulatory adjustments during high spinal anesthesia..... 337
- Papper, E. M. and Rovenstine, E. A.:  
Use of human plasma in spinal anesthesia 105
- Parsons, W. B.:  
E. H. Embley memorial lecture. Anaesthesia in military hospitals..... 458
- Powell, C. E., Lee, H. M. and Swanson, E. E.:  
Barbituric acid derivatives: relationship between action on smooth muscle and frog's heart, and chemical structure.... 560
- Queries and Minor Notes:  
Sudden death and anesthesia..... 669
- Ramond, S. W.:  
Tetracaine spinal anesthesia: review of 100 cases in private practice..... 105
- Rankow, R. M.:  
Pterygopalatine injection for block anesthesia of the maxilla..... 661
- Rea, C. E.:  
Shock, its cause and treatment..... 654
- Rennie, J. G.:  
Treatment of burns: with special reference to the use of sulfadiazine..... 453
- Robb, Douglas:  
Note on drugs for spinal anesthesia in wartime in New Zealand..... 223
- Rochberg, Samuel and Apgar, Virginia:  
Metabolic effects of the anesthetic agents 102
- Romberger, F. T.:  
What is good anesthesia? (Comment based on twenty-five thousand personally administered anesthetics.)..... 223
- Rosenfeld, S. S.:  
Combination of local and general anesthesia in obstetrics..... 229
- Rovenstine, E. A.:  
Development of anesthesiology..... 207
- Rucker, Edwin:  
Intravenous anesthesia in obstetrics.... 341
- Rutherford, R. N.:  
Continuous caudal anesthesia in obstetrics..... 658
- Saklad, Meyer, Saklad, Elihu and Sellman, Priscilla:  
Inhalation therapy..... 561
- Schaffner, V. D. and Found, E. M.:  
Spinal anesthesia in thoracoplasty.... 334
- Schmidt, H. W., Mousel, L. H. and Harrington, S. W.:  
Postoperative atelectasis; clinical aspects and a review of cases..... 448
- Seeberg, V. P.:  
Rapidly absorbed elixir of sodium barbital..... 561
- Seeberg, V. P. and Dille, J. M.:  
Comparative rate of gastrointestinal absorption of barbital, sodium barbital and elixir of barbital N. F. VII..... 561
- Shumacker, H. B., Manahan, C. P. and Hellman, L. M.:  
Sympathetic anesthesia in labor..... 445
- Siekerman, C. W.:  
Adaptability of various anesthetic agents to certain types of operations..... 464
- Siever, J. M. and Mousel, L. H.:  
Continuous caudal anesthesia in three hundred unselected obstetric cases.... 574
- Small, M. J.:  
Serious complication of caudal anesthesia..... 658
- Smirk, F. H. and McGeorge, Murray:  
S-methylisothiourea sulphate for maintaining blood-pressure in spinal anaesthesia..... 228
- Smith, D. L., D'Amour, Marie C. and D'Amour, F. E.:  
Analgesic properties of certain drugs and drug combinations..... 462
- Soper, R. L.:  
New method of administering pentothal sodium for a long period..... 552

|                                                                                                                                                          |     |                                                                                                                        |     |
|----------------------------------------------------------------------------------------------------------------------------------------------------------|-----|------------------------------------------------------------------------------------------------------------------------|-----|
| Thienes, C. H. and Greeley, P. O.:<br>Heart under cyclopropane.....                                                                                      | 219 | Watkins, R. M.:<br>Anesthetics in appendicitis; from the<br>Cleveland appendicitis survey. II....                      | 333 |
| Torda, Clara:<br>Effect of cocaine, ergotamine and yohim-<br>bine on the activity of phenol sulfur<br>esterase.....                                      | 462 | Weatherly, Howard:<br>Drug therapy in neuropsychiatric cases:<br>contraindications and complications....               | 88  |
| Turner, F. P. and Wilkinson, F. A. H.:<br>Operating room deaths: study of twenty-<br>three consecutive cases in which autop-<br>sies were performed..... | 108 | Weisman, S. A.:<br>Study of the analeptic value of certain<br>drugs in the treatment of quinidine de-<br>pression..... | 101 |
| Tyson, R. M.:<br>Effects of analgesia and anesthesia on<br>prematures.....                                                                               | 663 | Wheeler, D. W.:<br>Shock: its nature and therapy.....                                                                  | 322 |
| Waters, R. M.: (editorial)<br>Modern methods in anesthesia and the<br>war.....                                                                           | 321 | Wiggin, S. C.:<br>Anesthesia for the surgery of trauma... 330                                                          |     |
|                                                                                                                                                          |     | Wirth, W. R.:<br>Symposium on anesthesia: anesthesia in<br>heart disease.....                                          | 231 |

## BOOKS REVIEWED

|                                                                                                                                                                                                 | PAGE |                                                                                                                                                                                                           | PAGE |
|-------------------------------------------------------------------------------------------------------------------------------------------------------------------------------------------------|------|-----------------------------------------------------------------------------------------------------------------------------------------------------------------------------------------------------------|------|
| Andrews, Albert H., Jr.: Manual of oxygen<br>therapy techniques. Chicago, The Year<br>Book Publishers, Inc., 1943, 191 pp., 33<br>illustrations. Price, cloth \$1.75.....                       | 305  | Interscience Publishers, Inc., 1943, 373<br>pp., 80 illustrations and frontispiece.<br>Price, \$5.50.....                                                                                                 | 639  |
| Christopher, Frederick: A textbook of<br>surgery. Third Edition. Philadelphia<br>and London, W. B. Saunders Company,<br>1942, 1764 pp., 1538 illustrations, 771<br>figures. Price, \$10.00..... | 79   | Jordan, Edwin P.: Standard nomenclature<br>of disease and standard nomenclature of<br>operations. Third Edition. Chicago,<br>American Medical Association, 1942,<br>1022 pp. Price, fabrikoid \$4.00..... | 78   |
| Cole, Warren H., Puestow, Charles B. and<br>others: First aid. Surgical and medical.<br>New York, D. Appleton-Century Com-<br>pany, 1942, 374 pp., 186 illustrations.<br>Price, \$3.00.....     | 79   | Livingston, W. K.: Pain mechanisms.<br>New York, The Macmillan Company,<br>1943, 253 pp. Price, cloth \$3.75.....                                                                                         | 542  |
| Gellhorn, Ernst: Autonomic regulations:<br>their significance for physiology, psychol-<br>ogy and neuropsychiatry. New York,                                                                    |      | Lundy, John S.: Clinical anesthesia: a man-<br>ual of clinical anesthesiology. Philadel-<br>phia and London, W. B. Saunders Com-<br>pany, 1942, 771 pp., 266 illustrations.<br>Price, \$9.00.....         | 200  |

## BOOKS RECEIVED

|                                                                                                                                                                                                                                                                                                    | PAGE |                                                                                                                                                            | PAGE |
|----------------------------------------------------------------------------------------------------------------------------------------------------------------------------------------------------------------------------------------------------------------------------------------------------|------|------------------------------------------------------------------------------------------------------------------------------------------------------------|------|
| <i>Skin Grafting of Burns.</i> By James Barrett<br>Brown, Lt. Col., M. C., A.U.S., and<br>Frank McDowell, Assistant in Clinical<br>Surgery, Washington University, St.<br>Louis, Missouri. Price, \$5.00. Pp. 204,<br>with 131 illustrations. Philadelphia: J.<br>B. Lippincott Company, 1943..... | 639  | <i>A Hundred Years of Medicine.</i> By C. D.<br>Haagensen and Wyndham E. B. Lloyd.<br>Price, \$3.75. Pp. 444. New York:<br>Sheridan House, Inc., 1943..... | 639  |
|                                                                                                                                                                                                                                                                                                    |      | <i>Hope Deferred.</i> By Jeanette Seletz. Price,<br>\$2.75. Pp. 536. New York: The Mac-<br>millan Company, 1943.....                                       | 639  |

## TABLES, ILLUSTRATIONS, ETC.

|                                                              | PAGE   |                                                                                 | PAGE   |
|--------------------------------------------------------------|--------|---------------------------------------------------------------------------------|--------|
| Drawing—New type tracheal tube cuff...                       | 7      | Table—Cases of drainage of submandibu-<br>lar abscesses.....                    | 26     |
| Pictures—New type tracheal tube cuff... 8, 9                 |        | Picture—Laryngoscope with thin blade...                                         | 27     |
| Pictures—Manometer and new type tra-<br>cheal tube cuff..... | 10     | Sketches—Intratracheal anesthesia for<br>drainage of submandibular abscess..... | 28     |
| Tables—Geriatrics and anesthesia.....                        | 20, 21 | Table—Anesthetic activity of steroids. 39, 40                                   |        |
|                                                              | 22, 23 |                                                                                 | 41, 42 |

|                                                                                    |          |                                                                     |          |
|------------------------------------------------------------------------------------|----------|---------------------------------------------------------------------|----------|
| Sketches—New oxygen therapy apparatus                                              | 49, 50   | Table—Tetrachlorethylene, cases                                     | 289      |
| Photographs—New oxygen therapy apparatus in use                                    | 51, 52   | Pictures—Postoperative atelectasis, x-rays                          | 308, 309 |
| Table—Side reactions after intravenous morphine                                    | 63       |                                                                     | 310      |
| Table—Recovery of pentobarbital sodium and sodium amytal from blood and from water | 116      | Picture—Ether insufflation bottle                                   | 311      |
| Graphs—Concentration of barbiturates in blood                                      | 117, 118 | Tracings—Reactions of respirations to stimulation                   | 349, 350 |
|                                                                                    | 119, 121 |                                                                     | 351, 352 |
|                                                                                    | 122, 123 |                                                                     | 353, 354 |
| Tables—Demerol premedication                                                       | 128, 130 |                                                                     | 355, 356 |
| Tables—Lethal dose, anesthetic dose, etc. of cyclopal                              | 136, 137 |                                                                     | 357      |
|                                                                                    | 138, 139 | Pictures—Steps in extradural puncture                               | 374, 375 |
|                                                                                    | 141, 142 |                                                                     |          |
| Tables—Arterial oxygen tensions                                                    | 146      | Drawing—Schematic representation of sensory fibers of viscera       | 377      |
| Graph—Arterial oxygen tensions                                                     | 147      | Table—Peridural anesthesia                                          | 379      |
| Sketch—Artificial breathing machine                                                | 161      | Graphs—Changes in lung volume                                       | 386, 387 |
| Table—Characteristics of soda lime canisters                                       | 163      |                                                                     | 388, 389 |
| Sketch—Modification of standard soda lime canister                                 | 164      | Graphs—Skin temperatures during anesthesia                          | 393, 394 |
| Table—Resistance in soda lime canisters                                            | 164      |                                                                     | 395, 396 |
| Graphs—Dead space in rebreathing units                                             | 166, 167 |                                                                     | 397, 398 |
|                                                                                    | 168, 169 |                                                                     | 399      |
| Picture—Stand for apparatus and arm board for administration of pentothal sodium   | 175      | Table—Stellate ganglion block                                       | 403, 405 |
| Picture—Pentothal equipment in use                                                 | 176      | Drawing—Fell-O'Dwyer apparatus                                      | 411      |
| Picture—Oxygen administration apparatus                                            | 177      | Drawing—Matas modification of O'Dwyer apparatus                     | 412      |
| Picture—Chair for transporting patient                                             | 178      | Photograph—Dennis E. Jackson                                        | 413      |
| Picture—Unusual types of sacra                                                     | 183      | Picture—Dennis E. Jackson's first anesthetic apparatus              | 415      |
| Table—Intramuscular injection of mety-caine, effects on rabbits                    | 187      | Photograph—Arthur E. Guedel                                         | 416      |
| Table—Metycaine, dosage equivalents                                                | 188      | Photograph—Wesley Bourne                                            | 417      |
| Picture—Equipment for continuous caudal analgesia                                  | 190      | Pictures—Letters from the Royal Society to Dr. Bourne               | 418, 419 |
| Picture—Blood transfusion equipment, donor vent tube and bottles                   | 203      | Drawing—Infant resuscitation                                        | 439      |
| Picture—Blood transfusion equipment, recipient vent tube and apparatus in use      | 204      | Tables—Inflammability of trichlorethyl-ene-oxygen-nitrogen mixtures | 442      |
| Pictures—Aberrant thymic tissue in lung                                            | 234, 235 | Graph—Inflammability of trichlorethyl-ene-oxygen-nitrogen mixtures  | 443      |
|                                                                                    | 236      | Table—Ignition temperatures of trichlor-ethylene in air and oxygen  | 444      |
| Graphs—Effects of nembutal and scopola-mine on human subjects                      | 239, 240 | Table—Results of injections of anesthetics in oil                   | 468, 469 |
|                                                                                    | 241, 242 | Photomicrographs—Nerves after injection of anesthetics in oil       | 471      |
|                                                                                    | 243, 244 | Tables—Premedication, effects in shock                              | 476, 477 |
|                                                                                    | 245      |                                                                     |          |
| Tables—Traumatic shock under certain anesthetics                                   | 249, 250 | Graph—Premedication, effect on hemo-concentration, blood pressure   | 481      |
|                                                                                    | 251      | Table—Cardiac irregularities during cyclo-propane-oxygen anesthesia | 489      |
| Photomicrographs—Response of bronchi to various anesthetics                        | 255      | Tracings—Experimental study, effects of cyclopropane on heart       | 490, 491 |
| Tables—Effect of anesthetics on bronchi                                            | 256, 257 |                                                                     | 492      |
| Tables—Anoxia in intrathoracic operations                                          | 269, 270 | Picture—Flat plate of the chest, acute pulmonary edema              | 512      |
|                                                                                    | 271      | Table—Wartime anesthesia, types of anes-thesia administered         | 522      |
|                                                                                    |          | Table—Effect of various doses of amylene hydrate                    | 525, 526 |
|                                                                                    |          | Tables—Toxicity of procaine and of intra-caine                      | 528, 530 |

|                                                                  |     |                                                                          |          |
|------------------------------------------------------------------|-----|--------------------------------------------------------------------------|----------|
| Graph—Relative toxicity of procaine and of intracaine.....       | 531 | Picture—Franz Kühn's anesthetic apparatus.....                           | 599      |
| Sketches—Funnel.....                                             | 546 | Pictures—Resuscitation apparatus..                                       | 609, 610 |
| Picture—Syringe holder.....                                      | 547 | Tracings—Effects of elevating pressure of breathing bag.....             | 614, 615 |
| Kymogram—Effect of morphine on activity of jejunum.....          | 583 | Table—Effects of elevating pressure of breathing bag.....                | 616      |
| Kymograms—Effect of pentothal sodium on activity of jejunum..... | 585 | Oscillogram—Mechanical interrupter.....                                  | 632      |
| Kymogram—Effect of ether on activity of jejunum.....             | 586 | Graph—Electronarcosis.....                                               | 633      |
| Kymogram—Effect of ethylene-oxygen on activity of jejunum.....   | 587 | Scheme—Theory of electron flow in nerves                                 | 635      |
| Kymogram—Effect of spinal anesthesia on activity of jejunum..... | 589 | Table—Amounts pentothal sodium used and wasted.....                      | 642      |
| Sketch—Scheele's experiment [carbon dioxide absorption].....     | 597 | Sketch—Pentothal dispensing bottles....                                  | 643      |
| Picture—Model of closed respiratory system.....                  | 598 | Picture—Syringe holder.....                                              | 643      |
|                                                                  |     | Picture—Arm-holder.....                                                  | 644      |
|                                                                  |     | Sketch—Arm-holder.....                                                   | 645      |
|                                                                  |     | Sketches—Metal protector for needle in continuous spinal anesthesia..... | 646      |

## MISCELLANY

|                                        | PAGE        |                                                                         | PAGE     |
|----------------------------------------|-------------|-------------------------------------------------------------------------|----------|
| American Society of Anesthetists, Inc. |             | Anesthesiology                                                          |          |
| Anesthesia Essay.....                  | 436         | Bindings for.....                                                       | 66, 201  |
| Announcements of Meetings.....         | 16, 125     |                                                                         | 273, 402 |
|                                        | 474, 618    | Removal of Business Office.....                                         | 533, 624 |
| Application for Membership.....        |             | Subscription and Membership Dues....                                    | 435      |
| No. 1, xix; No. 2, xix                 |             | Case Reports.....                                                       | 611      |
| No. 3, xix; No. 4, xix                 |             |                                                                         | 202, 204 |
| No. 5, xix                             |             |                                                                         | 306, 307 |
| Committee Chairmen.....                | 47          |                                                                         | 308, 438 |
| Election of Officers.....              | 30          |                                                                         | 543, 640 |
| Fellowship Committee.....              | 47          | Conservation of Scholarly Journals.....                                 | 629      |
| Library and Museum.....                | No. 1, xvii | Correspondence.....                                                     | 82, 312  |
| Officers and Committees.....           |             |                                                                         | 437      |
| No. 1, xx; No. 2, xx                   |             | Current Comment.....                                                    | 81, 202  |
| No. 3, xx; No. 4, xx                   |             |                                                                         | 306, 437 |
| No. 5, xx; No. 6, xx                   |             |                                                                         | 543, 640 |
| American Board of Anesthesiology       |             | International College of Surgeons—Prize for Essay on Anesthesia.....    | 134      |
| Announcements of Examinations..        | 24, 265     | New York State Medical Society; Section on Anesthesiology; Program..... | 144      |
|                                        | 371, 496    | Radio Programs: Anesthesia.....                                         | 486      |
|                                        | 595         | United States Army—Application of Anesthetists for Commission.....      | 69       |
| Change in Constitution.....            | 384, 515    |                                                                         |          |
| Election of Officers.....              | 360         |                                                                         |          |
| Questions for Examinations.....        | 134, 173    |                                                                         |          |
|                                        | 196, 199    |                                                                         |          |
|                                        | 262         |                                                                         |          |
